# Supplementary material
Source: PubMed Central journal article supplement (PMC9022897)
Supplement: 41372_2022_1391_MOESM1_ESM.pdf [file 41372_2022_1391_MOESM1_ESM.pdf]

**Supplemental Table 1: COVID-19 versus control maternal blood and cord blood cytokine levels**

| Cytokine                           | MOM BLOOD<br>Mean (SD) |                   |                              |                   | CORD BLOOD / INFANT BLOOD<br>Mean (SD) |                    |                               |                   |
|------------------------------------|------------------------|-------------------|------------------------------|-------------------|----------------------------------------|--------------------|-------------------------------|-------------------|
|                                    | CONTROL<br>N=28        | COVID<br>N=31     | MD<br>(95% CI)               | P-Value           | CONTROL<br>N=28                        | COVID<br>N=31      | MD (95%<br>CI)                | P-Value           |
| <b>IL-1<math>\beta</math></b>      | 20.7<br>(44.0)         | 144.6<br>(319.3)  | 123.8<br>(-95.2,<br>342.9)   | 0.23              | 69.1<br>(274.9)                        | 276.9<br>(853.3)   | 207.8<br>(-889.0,<br>1304.6)  | 0.66              |
| <b>IL-6</b>                        | 26.9<br>(57.9)         | 544.7<br>(887.9)  | 517.9<br>(125.8,<br>909.9)   | <b>0.01</b>       | 34.4<br>(65.5)                         | 610.2<br>(652.3)   | 575.8<br>(293.7,<br>857.9)    | <b>0.0002</b>     |
| <b>TNF-<math>\alpha</math></b>     | 19.8<br>(46.5)         | 3009.2<br>(n/c)   | n/c                          | n/c               | 7.1<br>(14.2)                          | 119.6<br>(393.1)   | 112.4<br>(-706.3,<br>931.2)   | 0.72              |
| <b>IP-10</b>                       | 95.8<br>(91.5)         | 598.3<br>(448.3)  | 502.5<br>(329.3,<br>675.7)   | <b>&lt;0.0001</b> | 74.4<br>(60.9)                         | 448.2<br>(353.9)   | 373.7<br>(239.7,<br>507.7)    | <b>&lt;0.0001</b> |
| <b>IFN-<math>\lambda</math>1</b>   | 21.1<br>(12.4)         | 271.6<br>(481.0)  | 250.5<br>(-4.1,<br>505.1)    | 0.05              | 10.5<br>(8.3)                          | 88.1<br>(293.3)    | 77.7<br>(-82.2,<br>237.5)     | 0.33              |
| <b>IL-8</b>                        | 57.8<br>(220.7)        | 284.0<br>(415.9)  | 226.2<br>(-37.7,<br>133.9)   | 0.09              | 137.7<br>(286.2)                       | 2792.3<br>(5631.6) | 2654.7<br>(338.24,<br>4971.1) | <b>0.0256</b>     |
| <b>IL-12p70</b>                    | 5.2<br>(12.1)          | 38.7<br>(149.2)   | 33.5<br>(-66.9,<br>113.9)    | 0.47              | 3.7<br>(5.7)                           | 249.0<br>(23.4)    | 245.3<br>(171.9,<br>318.6)    | <b>0.005</b>      |
| <b>IFN-<math>\alpha</math>2</b>    | 18.1<br>(34.2)         | 140.7<br>(442.6)  | 112.5<br>(-121.6,<br>66.7)   | 0.31              | 2.8<br>(5.9)                           | 86.2<br>(368.3)    | 83.4<br>(-476.7,<br>643.5)    | 0.72              |
| <b>IFN-<math>\lambda</math>2/3</b> | 126.5 (159.6)          | 922.6<br>(2224.7) | 796.1<br>(-780.0,<br>2372.2) | 0.30              | 117.2<br>(56.4)                        | 478.3<br>(1812.8)  | 361.1<br>(-1857.9,<br>2580.0) | 0.70              |
| <b>GM-CSF</b>                      | 19.1<br>(35.2)         | 89.3<br>(368.9)   | 70.2<br>(-268.6,<br>409.1)   | 0.65              | 12.8<br>(21.0)                         | n/c                | n/c                           | n/c               |
| <b>IFN-<math>\beta</math></b>      | 36.2<br>(51.8)         | 253.4<br>(293.2)  | 217.2<br>(9.0,<br>425.4)     | <b>0.04</b>       | 74.3<br>(246.4)                        | 130.6<br>(224.3)   | 56.2<br>(-251.3,<br>363.7)    | 0.70              |
| <b>IL-10</b>                       | 10.3<br>(24.7)         | 206.6<br>(442.0)  | 196.3<br>(-69.9,<br>462.6)   | 0.14              | 6.4<br>(14.5)                          | 87.3<br>(193.8)    | 80.9<br>(-66.5,<br>228.2)     | 0.26              |
| <b>IFN-<math>\gamma</math></b>     | 25.2<br>(70.8)         | 80.4<br>(338.4)   | 55.2<br>(-222.8,<br>333.1)   | 0.66              | 17.3<br>(31.8)                         | 8.1<br>(2.2)       | -9.2<br>(-47.7, 29.2)         | 0.54              |

**Abbreviations:** MD = mean difference; CI = confidence interval; IL = interleukin; TNF = tumor necrosis factor; IFN = interferon; GM-CSF = granulocyte-macrophage colony-stimulating factor; IP = interferon gamma-induced protein; n/c = not able to calculate
