# Supplementary material
Source: PubMed Central journal article supplement (PMC9022897)
Supplement: 41372_2022_1391_MOESM2_ESM.pdf [file 41372_2022_1391_MOESM2_ESM.pdf]

**Supplemental Table 2: Maternal blood and cord blood cytokine comparisons by trimester of maternal infection**

| Cytokine              | Control<br>N=28<br>Mean (SD) | 1 <sup>st</sup> / 2 <sup>nd</sup><br>Trimester<br>COVID<br>N=18<br>Mean (SD) | 3 <sup>rd</sup> Trimester<br>COVID<br>N=10<br>Mean (SD) | P-value<br>Control<br>vs 1 <sup>st</sup> /2 <sup>nd</sup> | P-Value<br>Control<br>vs 3 <sup>rd</sup> | P-Value<br>1 <sup>st</sup> /2 <sup>nd</sup> vs<br>3 <sup>rd</sup> |
|-----------------------|------------------------------|------------------------------------------------------------------------------|---------------------------------------------------------|-----------------------------------------------------------|------------------------------------------|-------------------------------------------------------------------|
| <b>Maternal Blood</b> |                              |                                                                              |                                                         |                                                           |                                          |                                                                   |
| IL-1 $\beta$          | 20.7 (44.0)                  | 176.3 (390.7)                                                                | n/c                                                     | 0.67                                                      | n/c                                      | n/c                                                               |
| IL-6                  | 26.9 (57.9)                  | 667.4 (1027.1)                                                               | 328.2 (435.5)                                           | <b>0.02</b>                                               | 0.09                                     | 0.38                                                              |
| TNF- $\alpha$         | 19.7 (46.5)                  | n/c                                                                          | n/c                                                     | n/c                                                       | n/c                                      | n/c                                                               |
| IP-10                 | 95.8 (91.5)                  | 370.1 (646.1)                                                                | 593.0 (484.2)                                           | 0.08                                                      | <b>0.009</b>                             | 0.35                                                              |
| IFN- $\lambda$ 1      | 21.1 (12.4)                  | 441.2 (554.4)                                                                | 23.4 (8.7)                                              | 0.07                                                      | 0.72                                     | 0.27                                                              |
| IL-8                  | 57.8 (220.7)                 | 346.8 (474.7)                                                                | 164.9 (227.4)                                           | 0.05                                                      | 0.31                                     | 0.32                                                              |
| IL-12p70              | 5.2 (12.1)                   | 349.9 (97.3)                                                                 | n/c                                                     | 0.13                                                      | n/c                                      | n/c                                                               |
| IFN- $\alpha$ 2       | 18.1 (34.2)                  | 177.7 (520.9)                                                                | 72.0 (211.5)                                            | 0.45                                                      | 0.70                                     | 0.75                                                              |
| IFN- $\lambda$ 2/3    | 126.5 (159.6)                | 1347.6 (2583.5)                                                              | 333.0 (819.8)                                           | 0.26                                                      | 0.78                                     | 0.62                                                              |
| GM-CSF                | 19.1 (35.2)                  | 179.8 (437.3)                                                                | n/c                                                     | 0.59                                                      | n/c                                      | n/c                                                               |
| IFN- $\beta$          | 36.2 (51.8)                  | 307.0 (337.6)                                                                | n/c                                                     | <b>0.02</b>                                               | n/c                                      | n/c                                                               |
| IL-10                 | 10.3 (24.7)                  | 447.1 (391.2)                                                                | 73.6 (214.9)                                            | <b>0.04</b>                                               | 0.66                                     | 0.18                                                              |
| IFN- $\gamma$         | 25.2 (70.8)                  | 119.1 (475.4)                                                                | n/c                                                     | 0.83                                                      | n/c                                      | n/c                                                               |
| <b>Cord Blood</b>     |                              |                                                                              |                                                         |                                                           |                                          |                                                                   |
| IL-1 $\beta$          | 69.1 (274.9)                 | 1253.7 (810.5)                                                               | 85.4 (6.3)                                              | 0.29                                                      | 0.91                                     | 0.18                                                              |
| IL-6                  | 34.4 (65.5)                  | 634.1 (580.5)                                                                | 567.1 (776.7)                                           | <b>0.0007</b>                                             | 0.15                                     | 0.83                                                              |
| TNF- $\alpha$         | 7.1 (14.2)                   | 218.5 (464.2)                                                                | n/c                                                     | 0.51                                                      | n/c                                      | n/c                                                               |
| IP-10                 | 74.4 (60.9)                  | 514.1 (334.6)                                                                | 406.3 (375.8)                                           | <b>&lt;0.0001</b>                                         | <b>0.04</b>                              | 0.48                                                              |
| IFN- $\lambda$ 1      | 10.5 (8.3)                   | 130.3 (351.7)                                                                | 11.4 (9.3)                                              | 0.54                                                      | 0.88                                     | 0.59                                                              |
| IL-8                  | 137.7 (286.2)                | 2690.3 (5471.3)                                                              | 3009.2<br>(6343.0)                                      | 0.07                                                      | 0.24                                     | 0.90                                                              |
| IL-12p70              | 3.7 (5.7)                    | 251.3 (28.7)                                                                 | n/c                                                     | 0.05                                                      | n/c                                      | n/c                                                               |
| IFN- $\alpha$ 2       | 2.8 (5.9)                    | 129.9 (448.8)                                                                | n/c                                                     | 0.67                                                      | n/c                                      | n/c                                                               |
| IFN- $\lambda$ 2/3    | 117.2 (56.3)                 | 700.3 (2207.4)                                                               | n/c                                                     | 0.69                                                      | n/c                                      | n/c                                                               |
| GM-CSF                | 12.8 (21.0)                  | n/c                                                                          | n/c                                                     | n/c                                                       | n/c                                      | n/c                                                               |
| IFN- $\beta$          | 74.3 (246.4)                 | 171.1 (284.2)                                                                | 53.6 (102.9)                                            | 0.56                                                      | 0.89                                     | 0.60                                                              |
| IL-10                 | 6.4 (14.5)                   | 114.8 (229.9)                                                                | 35.5 (65.7)                                             | 0.35                                                      | 0.53                                     | 0.50                                                              |
| IFN- $\gamma$         | 17.3 (31.8)                  | n/c                                                                          | 9.8 (1.9)                                               | n/c                                                       | 0.80                                     | n/c                                                               |

**Abbreviations:** MD = mean difference; CI = confidence interval; IL = interleukin; TNF = tumor necrosis factor; IFN = interferon; GM-CSF = granulocyte-macrophage colony-stimulating factor; IP = interferon gamma induced protein; n/c = not able to calculate
