# Supplementary material
Source: PubMed Central journal article supplement (PMC9022897)
Supplement: 41372_2022_1391_MOESM3_ESM.pdf [file 41372_2022_1391_MOESM3_ESM.pdf]

**Supplemental Table 3: Correlation between maternal blood and cord blood cytokine levels**

| <b>Cytokine</b>                     | <b>Correlation coefficient<br/>COVID group only</b> | <b>P-Value</b>    |
|-------------------------------------|-----------------------------------------------------|-------------------|
| <b>IL-1<math>\beta</math></b>       | n/c                                                 | n/c               |
| <b>IL-6</b>                         | -0.04                                               | 0.86              |
| <b>TNF-<math>\alpha</math></b>      | n/c                                                 | n/c               |
| <b>IP-10</b>                        | 0.78                                                | <b>&lt;0.0001</b> |
| <b>IFN-<math>\lambda</math> 1</b>   | 0.99                                                | <b>&lt;0.0001</b> |
| <b>IL-8</b>                         | -0.16                                               | 0.51              |
| <b>IL-12p70</b>                     | n/c                                                 | n/c               |
| <b>IFN-<math>\alpha</math>2</b>     | 0.99                                                | 0.06              |
| <b>IFN-<math>\lambda</math> 2/3</b> | n/c                                                 | n/c               |
| <b>GM-CSF</b>                       | n/c                                                 | n/c               |
| <b>IFN-<math>\beta</math></b>       | 0.19                                                | 0.76              |
| <b>IL-10</b>                        | 0.71                                                | 0.12              |
| <b>IFN-<math>\gamma</math></b>      | n/c                                                 | n/c               |
