# Supplementary material
Source: PubMed Central journal article supplement (PMC9022897)
Supplement: 41372_2022_1391_MOESM4_ESM.pdf [file 41372_2022_1391_MOESM4_ESM.pdf]

## IFN- $\lambda$ 1

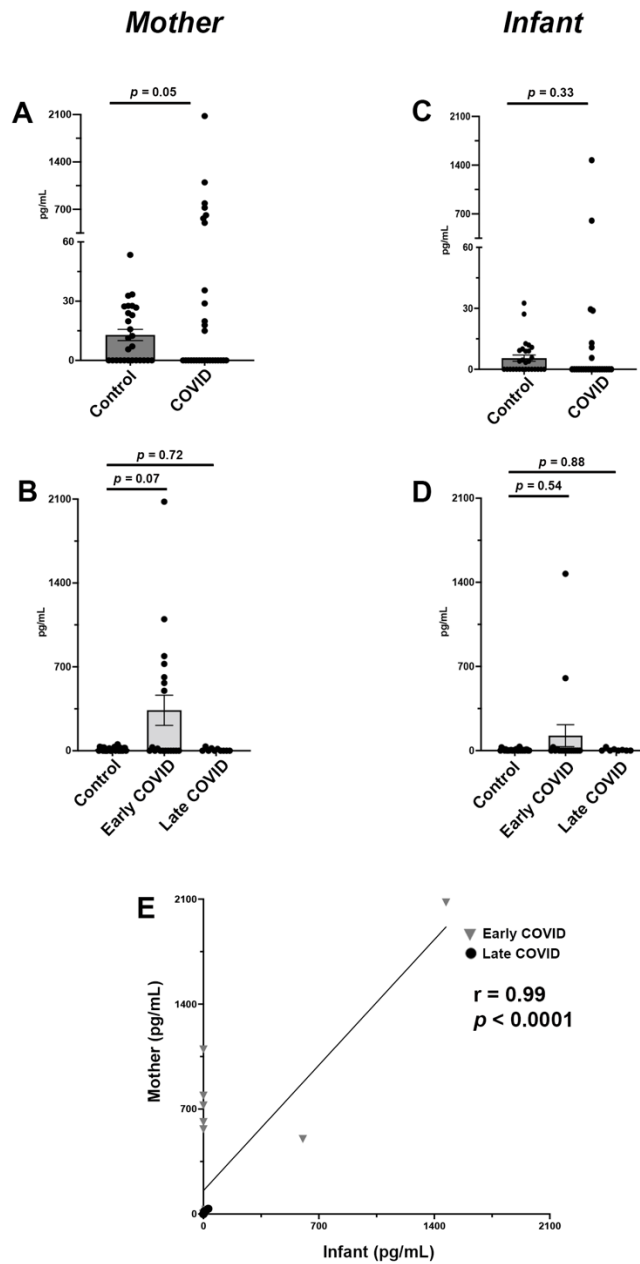

**Supplemental Figure 1. IFN- $\lambda$  1 levels in maternal and infant serum following SARS-CoV-2 infection in pregnancy.** A: Maternal serum IFN- $\lambda$  1 expression in Control vs COVID cohorts. B: Maternal serum IFN- $\lambda$  1 sub-analysis among Control, Early COVID and Late COVID cohorts. C: Infant serum IFN- $\lambda$  1 expression in Control vs COVID cohorts. D: Infant serum IFN- $\lambda$  1 sub-analysis among Control, Early COVID and Late COVID cohorts. E: Correlation analysis of IFN- $\lambda$  1 expression in maternal-infant dyads. *Control*, *COVID*, *Early COVID*, and *Late COVID*: as described in Figures 1 and 2.
